1 ***Pex11 $\beta$*  knockdown decreases peroxisome abundance and reverses the inhibitory**  
2 **effect of palmitate on pancreatic beta-cell function.**

3

4 Helen R Blair<sup>1</sup>, Cara Tomas<sup>1</sup>, Audrey E Brown<sup>1</sup>, Satomi Miwa<sup>2</sup>, Alan Health<sup>3</sup>, Alison Russell<sup>3</sup>,  
5 Michael-van Ginkel<sup>3</sup>, David Gunn<sup>3</sup>, Mark Walker<sup>1\*</sup>

6

7 1. Translational & Clinical Research Institute, Faculty of Medical Sciences, Newcastle

8 University, Newcastle upon Tyne, UK

9 2. Biosciences Institute, Faculty of Medical Sciences, Newcastle University, Newcastle upon

10 Tyne, UK

11 3. Unilever Discover, Colworth Science Park, Sharnbrook, Bedford, UK.

12

13

14 **\*Corresponding Author:**

15 Mark.walker@ncl.ac.uk

16

17 **Aims**

18 Reactive oxygen species generated by the peroxisomes and mitochondria contribute to  
19 lipotoxicity in pancreatic beta-cells. Through targeted *Pex11β* knockdown and peroxisome  
20 depletion, our aim was to investigate the specific contribution of peroxisomes to palmitate  
21 mediated pancreatic beta-cell dysfunction.

22 **Methods**

23 MIN6 cells were transfected with probes targeted against *Pex11β*, a regulator of peroxisome  
24 abundance, or with scrambled control probes. Peroxisome abundance was measured by  
25 PMP-70 protein expression. 48hrs post transfection, cells were incubated with or without  
26 250μM palmitate for a further 48hrs before measurement of reactive oxygen species,  
27 mitochondrial respiratory function, and glucose stimulated insulin secretion.

28 **Results**

29 *Pex11β* knockdown decreased target gene expression by more than 80% compared with the  
30 scrambled control ( $P<0.001$ ), leading to decreased PMP-70 expression ( $p<0.01$ ). *Pex11β*  
31 knockdown decreased palmitate mediated generation of reactive oxygen species ( $P<0.001$ ),  
32 but with no effect on mitochondrial respiratory function. At 25mM glucose, palmitate  
33 treatment decreased insulin secretion in the control cells ( $2.54\pm 0.25$  vs  $7.07\pm 0.83$   
34 [mean±SEM] ng/hr/μg protein;  $P<0.001$ ), with a similar pattern in the *Pex11β* knockdown  
35 cells. However, in the presence of palmitate, insulin secretion was significantly higher in the  
36 *Pex11β* knockdown versus control cells ( $4.04\pm 0.46$  vs  $2.54\pm 0.25$  ng/hr/μg protein;  $p<0.05$ ).

37 **Conclusion**

38 *Pex11β* knockdown decreased peroxisome abundance, decreased palmitate mediated ROS  
39 generation, and reversed the inhibitory effect of palmitate on insulin secretion. These  
40 findings highlight a specific and independent role for peroxisomes in pancreatic beta-cell  
41 lipotoxicity.

42

43

44

45

## 46 **Introduction**

47 Increased adiposity is a risk factor for type 2 diabetes. Ectopic fat deposition arises when  
48 excess lipid is stored in tissues other than adipose tissue, such as the liver, muscle and  
49 pancreas. Lipid excess in the pancreas is associated with pancreatic beta-cell dysfunction  
50 and impaired insulin secretion (1-4). In vitro, chronic treatment with the long chain  
51 saturated fatty acid palmitate has been shown to reduce insulin secretion in human, rat and  
52 mouse islets (5-7) and pancreatic beta-cell lines (7-10).

53 Fatty acid  $\beta$ -oxidation in animals and man is conducted by both peroxisomes and  
54 mitochondria (11, 12). Peroxisomes have a role in  $\beta$ -oxidation of long and medium chain  
55 fatty acids, with the intermediate products transported to the mitochondria for complete  
56 oxidation (12, 13). The first step of peroxisomal  $\beta$ -oxidation generates reactive oxygen  
57 species (ROS), principally hydrogen peroxide ( $H_2O_2$ ). In the majority of cells, this is  
58 catabolised by oxidoreductase catalase. However, pancreatic  $\beta$ -cells are essentially deficient  
59 in this enzyme (14-16) leaving them at risk of lipotoxicity from excess  $H_2O_2$  production.

60 Elsner and colleagues demonstrated that peroxisomes are a major source of  $H_2O_2$  following  
61 palmitate treatment of insulin secretory cells. Overexpression of catalase in peroxisomes  
62 and in the cytosol decreased ROS generation by both the peroxisomes and the  
63 mitochondria, and led to an improvement in cell viability (17). It remains to be shown,  
64 however, whether targeted decrease in peroxisome ROS generation specifically improves  
65 pancreatic beta-cell function in the presence of palmitate.

66 To address this question, we developed a model of targeted peroxisome depletion in MIN6  
67 cells. Peroxisome proliferation occurs by de novo generation from the endoplasmic  
68 reticulum and through the division of pre-existing peroxisomes that involves Pex11 proteins  
69 (18-21). Pex11 $\beta$  is a protein responsible for the constitutive turnover of peroxisomes and  
70 *Pex11 $\beta$*  knockout mice have decreased peroxisome abundance (22-24). Through siRNA  
71 silencing of the *Pex11 $\beta$*  gene we decreased peroxisome abundance and ROS generation in  
72 MIN6 cells, and found improved beta-cell function in the presence of palmitate.

73

## 74 **Materials and Methods**

### 75 **Cell Culture and Palmitate Medium**

76 MIN6 cells were donated by Dr Catherine Arden (Diabetes Research Group, Newcastle  
77 University, UK) and experiments were performed with cells of passage 23-30. MIN6 cells  
78 were cultured in DMEM containing 4500mg/L glucose, L-glutamine and sodium bicarbonate  
79 (Sigma), and supplemented with 15% FBS (Life Technologies), 1% Penicillin/Streptomycin  
80 (Life Technologies), and 0.0005%  $\beta$ -mercaptoethanol (Sigma). Cells were incubated at 37°C,  
81 5% CO<sub>2</sub> and passaged when 70-80% confluent. For relevant experiments, MIN6 cells were  
82 incubated with 250 $\mu$ M palmitate conjugated to BSA for the final 48hrs before end point  
83 measurements were taken. Palmitate was dissolved in deionised water at 70°C before BSA  
84 (dissolved in PBS) was added to give a final 4mM stock palmitate solution with a 5:1 ratio,  
85 BSA:Palmitate. The palmitate stock was diluted in supplemented DMEM to the final  
86 concentration before treatment.

### 87 **Transfection with siRNA against *Pex11 $\beta$***

88 MIN6 cells were transfected using the Neon Transfection System (Life Technologies) as  
89 previously described (25). Two predesigned Ambion siRNA probes against *Pex11 $\beta$* , s71497  
90 and s71499 (Life Technologies), and a Scrambled siRNA negative control (Life Technologies)  
91 were used for the transfection at a concentration of 100nM. The siRNA sequences for the  
92 *Pex11 $\beta$*  probes were as follows: s71497, 5'-UCAUGAAUCUGAGCCGUGAtt-3'; 3'-  
93 UCACGGCUCAGAUUCAUGAtg-5', and s71499, 5'- CAACCGAGCCUUGUACUUUtt-3'; 3'-  
94 AAAGUACAAGGCUCGGUUGag-5'.

### 95 **Real-time PCR**

96 72hr or 96hr after transfection, RNA was extracted using GenElute™ Mammalian Total RNA  
97 Miniprep Kit (Sigma) according to the manufacturer's instructions. Following quantification  
98 of the RNA on a NanoDrop 2000 Spectrophotometer (Thermoscientific), cDNA was  
99 synthesised using the High Capacity cDNA Reverse Transcription Kit (Applied Biosystems),  
100 according to the manufacturer's instructions. Real-time PCR was carried out on  
101 LightCycler®480 (Roche) using SYBR-green. Predesigned QuantiTect® Primer Assays (Qiagen)  
102 were used for all genes: *Pex11 $\beta$*  and *Ykt6*. *Ykt6* was used as the reference gene. The PCR  
103 reactions were carried out using LightCycler 480 SYBR green I mastermix (Roche). Results  
104 were analysed using the comparative C<sub>T</sub> ( $\Delta\Delta C_T$ ) method.

105

## 106 **Immunofluorescence**

107 MIN6 cells grown directly onto sterile cover slips were washed with PBS then fixed with 4%  
108 paraformaldehyde for 20 minutes at room temperature. Cells were permeabilised with 0.2%  
109 t-octylphenoxy-polyethoxyethanol (Triton x-100, Sigma) for 45 minutes. Coverslips were  
110 incubated with 20% FBS in PBS for 1 hour at room temperature to block non-specific  
111 binding. Cells were incubated with 1:600 dilution of rabbit anti-PMP-70 (Abcam) in 0.05%  
112 FBS in PBS at 20-22°C for 1 hour. Cells were then washed with PBS, and incubated with  
113 1:300 dilution of anti-rabbit Alexa Fluor® 546 (Life Technologies) in 0.05% FBS in PBS for one  
114 hour at room temperature in the dark. The cover slips were then washed again in PBS  
115 before mounting on slides with Vectashield Mounting Medium with DAPI (Vector). Slides  
116 were visualised on a Zeiss LSM 780 confocal microscope. Quantification of the images was  
117 calculated as the number of peroxisomes per area of the image that was covered by cells.

## 118 **Western Blot**

119 Cells were harvested in protein extraction buffer (100mM Tris-Cl, pH 7.4, 100mM KCl, 1mM  
120 EDTA , 25mM KF, 0.1% Triton X-100, 0.5mM sodium orthovanadate, 1x protease inhibitor  
121 cocktail (Thermo Scientific)) and sonicated for approximately 10 seconds at 5µm amplitude.  
122 Protein concentrations were determined using Coomassie blue, and read on a  
123 spectrophotometer at 595nm. 10µg protein was boiled for 5 min with sample buffer  
124 (62.5mM Tris-HCl pH 6.8, 2% SDS, 10% Glycerol, 0.002% Bromo-phenol blue, 5% β-  
125 mercaptoethanol) before being separated on a 10% SDS-PAGE gel. The separated proteins  
126 were electrotransferred onto nitrocellulose membranes before being blocked for 1hr in TBS-  
127 Tween (65mM Tris-HCl, pH 7.4, 150mM NaCl, 0.1% Tween) containing 5% Marvel milk  
128 powder. Following incubation with the appropriate primary and secondary antibodies in 1%  
129 Marvel, detection was carried out with the addition of enhanced chemiluminescent solution  
130 (Thermo Fisher Scientific), and exposure of the nitrocellulose membrane to X-ray film. PMP-  
131 70 antibody was used at a 1:1000 dilution, and β-actin at a 1:10,000 dilution. Quantification  
132 of the protein bands was carried out using a GS-800 Calibrated Densitometer (BioRad) and  
133 the BioRad software Quantity One 4.2.3.

## 134 **Glucose Stimulated Insulin Secretion (GSIS)**

135 The method for carrying out GSIS was adapted from Ishihara et al. 1994 (26). Cells were  
136 starved for 30 mins with Krebs-Hepes buffer (119mM NaCl, 4.74mM KCl, 2.54mM CaCl<sub>2</sub>,  
137 1.19mM MgCl<sub>2</sub>, 1.19mM KH<sub>2</sub>PO<sub>4</sub>, 25mM NaHCO<sub>3</sub>, 10mM Hepes, 0.5% BSA pH 7.4), before

138 being incubated with Krebs-Hepes buffer for a further 1 hour with either 3mM (basal), or  
139 25mM (stimulating) glucose concentrations. Following incubation, supernatants were  
140 collected and insulin secretion determined using an Insulin ELISA kit (Merckodia) according to  
141 the manufacturer's instructions. Insulin secretion was normalised to total protein content.

#### 142 **Insulin Content**

143 Following GSIS with 3mM glucose, cells were washed with PBS and harvested in 50µl dH<sub>2</sub>O  
144 before being sonicated. 150µl acid ethanol (0.18 M HCl in 100% ethanol) was added to the  
145 samples and sonicated further. Samples were then stored at 4°C for 12 hours before insulin  
146 content was analysed by insulin ELISA using at least 1.100 dilution. Insulin content was  
147 normalised to total protein content.

#### 148 **Fatty acid oxidation**

149 96hrs post transfection which included 48hrs palmitate incubation, fatty acid oxidation was  
150 assessed by using the Seahorse XF24 Analyzer (Agilent Technologies) to measure  
151 mitochondrial respiration. Media was replaced with basic media containing 3% FBS and  
152 2mM L-glutamine with or without 250µM palmitate, and cells were placed in a CO<sub>2</sub> free  
153 incubator for 1hr. Oxygen consumption rates (OCR) were used to assess mitochondrial  
154 respiration by measurement before and after the injection of compounds that inhibit  
155 different mitochondrial complexes: 1µg/ml Oligomycin to inhibit Complex V (ATP synthase)  
156 which inhibits the generation of mitochondrial ATP, 2µM and 3.5µM of carbonyl cyanide p-  
157 trifluoromthoxy-phenylhydrazone (FCCP) which uncouples respiration, and finally Antimycin  
158 A, a mitochondrial complex III (Ubiquinol-Cytochrome c Reductase) inhibitor; which, by  
159 preventing electron transfer, results in the abolishment of ATP synthesis and respiration.  
160 Basal mitochondrial respiration = basal oxidation - non-mitochondrial oxidation. ATP  
161 synthesis by oxidative phosphorylation = ((Basal oxidation - non-mitochondrial oxidation) -  
162 (oligomycin inhibited oxidation - non-mitochondrial oxidation)) multiplied by 2.5 (the  
163 established phosphate/oxygen ratio for oxidation of palmitate (27)), and further multiplied  
164 by 2 (accounting for the 2 oxygen atoms per oxygen molecule).

#### 165 **Reactive oxygen species (ROS) detection**

166 96hrs post transfection which included 48hrs palmitate incubation, ROS were detected  
167 using 2',7' -dichlorofluorescein diacetate (DCFDA). ROS such as hydrogen peroxide, peroxy  
168 radicals, and peroxy nitrile anions can be detected in live cells when DCFDA is oxidised by the

169 ROS to form the fluorescent dye DCF (28). Cells were washed with PBS and 20 $\mu$ M DCFDA  
170 added. Cells were incubated at 37°C, 5% CO<sub>2</sub> for 45 minutes. Cells were washed twice with  
171 PBS and then incubated in supplemented PBS (90% PBS; 10% FBS) for 30 minutes.  
172 Fluorescence was recorded (Ex/Em = 485/535). Results were corrected for protein  
173 concentration.

#### 174 **Statistical Analysis**

175 All statistical analysis was carried out using Graphpad Prism 7 (GraphPad Software, San  
176 Diego, California, USA). Data are presented as mean  $\pm$  SEM (standard error of the mean).  
177 Statistical significance was tested through use of One way ANOVA followed by an unpaired  
178 t-test. Results were considered to be significant when the probability (p) value was <0.05.  
179

## 180 Results

### 181 Palmitate treatment and cell viability

182 The first step was to investigate the effects of 250 $\mu$ M palmitate on cell viability and  
183 apoptosis in MIN6 cells. Following treatment with 250 $\mu$ M palmitate for 48hrs, LDH release  
184 and caspase 3/7 activity were measured as indices of cell viability and apoptosis,  
185 respectively. There were no differences in LDH release or caspase 3/7 activity between the  
186 palmitate treated and BSA control cells (S Fig 1). Under the same conditions, we showed  
187 that insulin secretion at 25mM glucose was decreased by >50% in palmitate treated cells  
188 compared with the BSA controls; 2.45 $\pm$ 0.41 and 5.27 $\pm$ 0.83 ng insulin/ $\mu$ g protein respectively  
189 (P<0.05) (S Fig 1). Taken together, these data show that treatment with 250 $\mu$ M palmitate  
190 for 48hours impaired insulin secretory response but with no effect on cell viability.

191

### 192 *Pex11 $\beta$* knockdown decreases PMP-70 protein expression

193 MIN6 cells were transfected using siRNA probe s71497 against *Pex11 $\beta$* . At 96hr post  
194 transfection, *Pex11 $\beta$*  gene expression was significantly decreased by  $\geq$ 80% (Fig 1A) with  
195 compared with the scrambled negative control (P<0.001). PMP-70 is a major component of  
196 the peroxisome membrane and is used to measure peroxisome abundance (17, 29). At  
197 96hrs post-transfection, there was a 30% decrease in PMP-70 expression relative  $\beta$ -actin (Fig  
198 1B) in the *Pex11 $\beta$*  knockdown cells compared with the scrambled controls (p<0.001). Fig 1C  
199 is a representative blot of PMP-70 expression 96hrs post transfection with 2 probes, s71497  
200 and s71499. Only probe s71497 led to decreased PMP-70 expression and was therefore  
201 used for subsequent *Pex11 $\beta$*  knockdown experiments.

202

203 **Fig 1. *Pex11 $\beta$*  knockdown and PMP-70 expression in MIN6 cells.** MIN6 cells were  
204 transfected with probes (s71497) against *Pex11 $\beta$*  or scrambled control. **A)** *Pex11 $\beta$*  mRNA  
205 expression was measured after 96hrs by relative quantification using the reference gene  
206 *Ykt6*. The graph shows the mean  $\pm$  SEM for 3 separate experiments carried out for 3  
207 separate transfections (n=9), \*\*\* p<0.001. **B)** PMP-70 protein expression relative to  $\beta$ -actin  
208 expression was assessed at 96 hrs following *Pex11 $\beta$*  mRNA knockdown. The graph shows the  
209 mean  $\pm$  SEM for 3 separate experiments were carried out for 2 separate transfections (n=6),  
210 \*\*p<0.01. For both **A)** and **B)**, data are normalised to the scrambled control. **C)** A  
211 representative blot of PMP-70 and  $\beta$ -actin expression 96 hrs post-transfection



212 (Scr=scrambled control, 99=probe s71499 and 97=probe s71497). Decreased PMP-70  
213 expression was not achieved with s71499, so probe s71497 was used for all subsequent  
214 experiments.

215

216 To further investigate peroxisome abundance 96hrs post-transfection, cells were seeded  
217 onto coverslips and stained for PMP-70. *Pex11β* knockdown cells had fewer peroxisomes  
218 compared with the scrambled control cells (Figs 2A to 2D), corroborating the western  
219 blotting results. Analysis and quantification of the images showed a significant decrease of  
220 PMP-70 expression in *Pex11β* knockdown cells compared with the scrambled controls  
221 ( $P<0.05$ ; Fig 2E).

222

### 223 **Fig 2. Immunofluorescent visualization of peroxisomes following *Pex11β* knockdown.**

224 MIN6 cells were stained for PMP-70 as a marker of peroxisomes (red) 96hrs after  
225 transfection with the s71497 siRNA probe against *Pex11β*. DAPI was used for nuclear  
226 counterstaining (blue). **A)** and **B)** show cells transfected with the probe against *Pex11β*,  
227 while **C)** and **D)** are cells transfected with scrambled control. For the quantification of  
228 peroxisomes **E)** 9 images from a single transfection were analysed from 4 separate  
229 transfections and the number of peroxisomes per area of the image covered by the cells  
230 was calculated. Data are normalised to scrambled control and presented as mean  $\pm$  SEM, \*  
231  $p<0.05$ .

232 Having established that peroxisome abundance was decreased 96 hrs post *Pex11β*  
233 knockdown, all subsequent experiments followed the same design. 48hrs post transfection,  
234 MIN6 cells were incubated with either 250 $\mu$ M palmitate or BSA control for a further 48hrs.  
235 At 96 hrs post transfection, the relevant measure was made (eg ROS generation, GSIS).

236

### 237 ***Pex11β* knockdown does not alter mitochondrial respiratory function**

238 Oxygen consumption rate (OCR) was measured in MIN6 cells following siRNA transfection  
239 and treatment with palmitate using the Seahorse XF24 Analyzer (Fig 3A). In *Pex11β*  
240 knockdown cells, palmitate treatment increased ATP synthesis by oxidative phosphorylation  
241 (Fig 3B) and basal mitochondrial OCR (Fig 3C) compared with the BSA controls (both,  
242  $p<0.01$ ). The same pattern was seen in the scrambled controls treated with palmitate, with

243 a trend for an increase in both ATP synthesis and basal OCR. However, there were no  
244 differences between the *Pex11β* knockdown and scrambled control cells for ATP synthesis  
245 or basal mitochondrial OCR in the presence of palmitate. These data indicate that  
246 mitochondrial respiratory function in the presence of palmitate was not affected by  
247 peroxisome depletion.

248

### 249 **Fig 3. Palmitate treatment and mitochondrial respiratory function following *Pex11β***

250 **knockdown.** 48hrs post transfection MIN6 cells were incubated with 250μM palmitate or  
251 BSA control for a further 48hrs. Following this, media was replaced with basic seahorse  
252 media containing palmitate and cells were incubated in a CO<sub>2</sub> free incubator for 1hr prior to  
253 measuring oxygen consumption rate using the Seahorse XF24 Analyzer. In order to assess  
254 fatty acid oxidation, **A)** mitochondrial respiration was analysed by injections of compounds  
255 known to alter mitochondrial function: Oligomycin, FCCP, and Antimycin A. **B)** ATP synthesis  
256 by oxidative phosphorylation (OXPHOS) and **C)** Basal OCR were calculated as previously  
257 described. Data from 2 separate experiments each with 5 separate transfections were  
258 normalised to total protein content and expressed as pMoles/min/μg protein. Data are  
259 presented as mean±SEM. \*\*p<0.01 palmitate vs BSA control.

260

### 261 ***Pex11β* knockdown decreases palmitate induced ROS production**

262 Following treatment with 250μM palmitate or BSA control for 48hr, ROS production was  
263 measured in the transfected MIN6 cells using the dye DCFDA (Fig 4). In both *Pex11β*  
264 knockdown and scrambled control cells, palmitate significantly increased ROS production  
265 (P<0.001). In the presence of palmitate, ROS levels were markedly lower in the *Pex11β*  
266 knockdown cells compared with the scrambled controls (P<0.001).

267 **Fig 4. Palmitate treatment and ROS production following *Pex11β* knockdown.** 48hrs post  
268 transfection MIN6 cells were treated with either 250μM palmitate or BSA for a further 48hrs  
269 in medium containing 25mM glucose. The ROS detection dye DCFDA was added to the cells  
270 and ROS determined in triplicate for each transfection. The figure shows ROS in MIN6 cells  
271 transfected with *Pex11β* knockdown or scrambled siRNA and incubated in palmitate or BSA  
272 for 48hrs. Data from 6 separate transfections are normalised to total protein content. Data  
273 are presented as mean±SEM. \*\*\*p<0.001

274 ***Pex11β* knockdown reverses the inhibitory effect of palmitate in GSIS**

275 Following treatment with 250μM palmitate or a BSA control for 48hrs, GSIS was determined  
276 96 hrs post-transfection (Fig 5A). At 25mM glucose, palmitate treatment decreased GSIS in  
277 the scrambled control cells (2.54±0.25 vs 7.07±0.83 ng/hr/μg protein; palmitate vs BSA;  
278 P<0.001). Palmitate treatment had a similar but diminished inhibitory effect in the *Pex11β*  
279 knockdown cells (4.04±0.46 vs 6.40±1.02 ng/hr/μg protein; palmitate vs BSA). In the  
280 presence of palmitate, GSIS was significantly higher in the *Pex11β* knockdown versus  
281 scrambled control cells (4.04±0.46 vs 2.54±0.25 ng insulin/hr/μg protein; P<0.05). These  
282 data show that the inhibitory effect of palmitate on GSIS was less pronounced following  
283 peroxisome depletion.

284

285 **Fig 5. Palmitate treatment and insulin secretion and content following *Pex11β* knockdown**

286 48hrs post transfection, MIN6 cells were treated with 250μM palmitate or BSA control for a  
287 further 48hrs. Cells were then stimulated with either 3mM or 25mM glucose. **A)** Insulin  
288 secretion and **B)** insulin content were determined, and data from 3 separate experiments  
289 carried out in triplicate presented as mean±SEM. \*p<0.05, \*\*p<0.01, \*\*\*p<0.001

290

291 ***Pex11β* knockdown reverses the adverse effect of palmitate on insulin content**

292 We next investigated whether *Pex11β* knockdown altered intracellular insulin content (Fig  
293 5B). At 25mM glucose, insulin content was decreased by >80% in scrambled siRNA control  
294 cells treated with palmitate versus BSA control (10.78±1.37 and 61.67±10.78 ng insulin/μg  
295 protein, P<0.001). Similarly, palmitate treatment significantly decreased insulin content in  
296 the *Pex11β* knockdown cells (18.92±1.70 and 87.71±10.50 ng insulin/μg protein, P<0.001).  
297 However, insulin content was greater in *Pex11β* knockdown cells compared with the  
298 scrambled control cells in the presence of palmitate (18.92±1.70 vs 10.78±1.37 ng insulin/μg  
299 protein, P<0.01). These data show that the effect of palmitate to decrease insulin content  
300 was less pronounced in the *Pex11β* knockdown cells.

301

302

303

## 304 Discussion

305 We found that *Pex11β* knockdown decreased peroxisome abundance, decreased palmitate  
306 mediated ROS generation, and reversed the inhibitory effect of palmitate on GSIS. These  
307 beneficial changes were independent of mitochondrial respiratory function which was  
308 unaffected by *Pex11β* knockdown. Our investigations have established that targeted  
309 peroxisome depletion counteracts the adverse effects of palmitate on pancreatic beta-cell  
310 secretory function.

311 It is well established that chronic palmitate treatment decreases GSIS (5, 7, 8, 30). Watson  
312 et al found that 48hours treatment of MIN6 cells with 400μM palmitate decreased GSIS but  
313 also increased the pro-apoptotic marker caspase 3/7 activity (8). In addition, studies using  
314 primary rat islets have shown that 500μM palmitate treatment for 48 hours was cytotoxic  
315 with around 25% of cells damaged (31). Based on these findings we elected to use 250μM  
316 palmitate treatment for 48hours, and found that under these conditions there was a clear  
317 decrease in GSIS but with no evidence of increased cell damage or apoptosis relative to the  
318 BSA control.

319 Both peroxisomes and mitochondria are involved in the metabolism and oxidation of  
320 palmitate and related long-chain fatty acids (12). Peroxisome β-oxidation generates H<sub>2</sub>O<sub>2</sub>  
321 and shortens the fatty acid chain length prior to transfer to the mitochondria for complete  
322 oxidation and ATP generation. We first explored whether *Pex11β* knock down and  
323 decreased peroxisome abundance altered mitochondrial respiratory function. As shown in  
324 Fig 3, palmitate increased basal mitochondrial OCR and ATP generation to a comparable  
325 degree in the *Pex11β* knockdown and scrambled control cells. We therefore conclude that  
326 the beneficial effects of *Pex11β* knockdown and peroxisome depletion on beta-cell function  
327 were independent of changes in mitochondrial respiratory function.

328 We next examined ROS generation following palmitate treatment. As shown in Fig 4,  
329 palmitate treatment increased ROS generation, but this was markedly lower in the *Pex11β*  
330 knockdown compared with the scrambled control cells. This is consistent with the  
331 observation that peroxisomes are a major source of H<sub>2</sub>O<sub>2</sub> production in insulin producing  
332 cells (17). It has been proposed that H<sub>2</sub>O<sub>2</sub> produced by the peroxisomes may contribute to  
333 lipotoxicity due to the low levels of catalase expressed in pancreatic beta-cells (14-16). The  
334 over-expression of catalase in peroxisomes and the cytosol was found to decrease H<sub>2</sub>O<sub>2</sub>  
335 generated by both the peroxisomes and the mitochondria, and to protect against palmitate

336 toxicity in a rat beta-cell line and isolated rat islets (17). However, the relative contributions  
337 of the peroxisomes and mitochondria to the ROS mediated cytotoxicity was not be defined.  
338 Through targeted *Pex11β* knockdown and peroxisome depletion we have extended these  
339 findings and identified a clear and independent role for peroxisomes in palmitate mediated  
340 pancreatic beta-cell dysfunction.

341 It is recognised that ROS and specifically H<sub>2</sub>O<sub>2</sub> can adversely affect beta-cell function. Insulin  
342 secretion decreased from rat pancreatic islets when exposed to low H<sub>2</sub>O<sub>2</sub> concentrations  
343 similar to that of physiological levels. It was found that this was through the reduction of  
344 [Ca<sup>2+</sup>]<sub>i</sub> oscillation amplitude, which in turn inhibited GSIS (34). These observations suggest  
345 that palmitate increases H<sub>2</sub>O<sub>2</sub> production from peroxisomes which, through reduced [Ca<sup>2+</sup>]<sub>i</sub>  
346 oscillation amplitude, inhibit the insulin secretory response to glucose.

347 Previous studies have reported decreased insulin content in rodent and human pancreatic  
348 beta-cells after palmitate treatment (32, 33), with evidence that the mechanism involves  
349 decreased insulin translation (33). As shown in Fig 5B, palmitate decreased insulin content in  
350 both *Pex11β* knock down and control cells at high glucose, but this was less pronounced in  
351 the *Pex11β* knock down cells. It is not clear whether ROS and specifically H<sub>2</sub>O<sub>2</sub> exert an  
352 inhibitory effect on insulin synthesis as well as secretion. Nonetheless, our findings show  
353 that *Pex11β* knockdown and decreased peroxisome abundance reverses the adverse effects  
354 of palmitate on both insulin secretion and insulin content.

355 Our results support the concept that peroxisomes are involved in lipotoxicity and pancreatic  
356 beta-cell dysfunction, and thereby might well contribute to the pathogenesis of type 2  
357 diabetes. However, exploring peroxisomes as potential targets for therapies that counteract  
358 the impact of lipotoxicity on beta-cell function requires careful consideration. This follows a  
359 recent study that described a beta-cell specific *Pex5* knockout mouse (35). *Pex5* is required  
360 for the import into the peroxisome of the majority of the enzymes essential for lipid  
361 metabolism. While there was evidence of *decreased* GSIS, this appears to be a model of  
362 severe peroxisome dysfunction. First, the beta-cell specific *Pex5* knockout resulted in a 5  
363 fold increase in long chain fatty acid levels in the systemic circulation. Second, the  
364 phenotype extended beyond peroxisome dysfunction, with evidence of mitochondrial  
365 dysfunction, increased beta-cell apoptosis and decreased beta-cell mass. So while partial  
366 peroxisome depletion appears to improve beta-cell function in the presence of palmitate,

367 there is the risk that more severe peroxisome dysfunction might trigger secondary off-target  
368 changes and an overall impairment of beta-cell function.

369 In conclusion, we have shown that *Pex11β* knockdown decreased peroxisome abundance,  
370 decreased palmitate mediated ROS generation, and reversed the inhibitory effect of  
371 palmitate on GSIS. This highlights a potential role of peroxisomes in pancreatic beta-cell  
372 lipotoxicity and the pathogenesis of type 2 diabetes.

373

#### 374 **Authors Contributions**

375 HRB, DG and MW conceived and designed the study. HRB, CT, AEB, SM, AH, AR and MvG  
376 conducted the experiments, and generated and analysed the data. All authors contributed  
377 to data interpretation and the writing of the paper.

## 378 References

- 379 1. Cusi K. The Role of Adipose Tissue and Lipotoxicity in the Pathogenesis of Type 2  
380 Diabetes. *Current Diabetes Reports*. 2010;10(4):306-15.
- 381 2. Kusminski C, Shetty S, Orci L, Unger R, Scherer P. Diabetes and apoptosis: lipotoxicity.  
382 Apoptosis. 2009;14(12):1484-95.
- 383 3. Unger RH, Zhou YT. Lipotoxicity of beta-cells in obesity and in other causes of fatty  
384 acid spillover. *Diabetes*. 2001;50(suppl 1):S118.
- 385 4. Schrauwen P, Hesselink MKC. Oxidative Capacity, Lipotoxicity, and Mitochondrial  
386 Damage in Type 2 Diabetes. *Diabetes*. 2004;53(6):1412-7.
- 387 5. Hoppa MB, Collins S, Ramracheya R, Hodson L, Amisten S, Zhang Q, et al. Chronic  
388 Palmitate Exposure Inhibits Insulin Secretion by Dissociation of Ca<sup>2+</sup> Channels from  
389 Secretory Granules. *Cell Metabolism*. 2009;10(6):455-65.
- 390 6. Zhou YP, Grill V. Long term exposure to fatty acids and ketones inhibits B-cell  
391 functions in human pancreatic islets of Langerhans. *J Clin Endocrinol Metab*.  
392 1995;80(5):1584-90. Epub 1995/05/01.
- 393 7. Sun Y, Ren M, Gao G-q, Gong B, Xin W, Guo H, et al. Chronic palmitate exposure  
394 inhibits AMPK[alpha] and decreases glucose-stimulated insulin secretion from [beta]-cells:  
395 modulation by fenofibrate. *Acta Pharmacol Sin*. 2008;29(4):443-50.
- 396 8. Watson ML, Macrae K, Marley AE, Hundal HS. Chronic Effects of Palmitate Overload  
397 on Nutrient-Induced Insulin Secretion and Autocrine Signalling in Pancreatic MIN6 Beta  
398 Cells. *PLoS ONE*. 2011;6(10):e25975.
- 399 9. Choi S-E, Lee Y-J, Jang H-J, Lee K-W, Kim Y-S, Jun H-S, et al. A chemical chaperone 4-  
400 PBA ameliorates palmitate-induced inhibition of glucose-stimulated insulin secretion (GSIS).  
401 *Archives of Biochemistry and Biophysics*. 2008;475(2):109-14.
- 402 10. Kristinsson H, Smith DM, Bergsten P, Sargsyan E. FFAR1 is involved in both the acute  
403 and chronic effects of palmitate on insulin secretion. *Endocrinology*. 2013;154(11):4078-88.  
404 Epub 2013/09/17.
- 405 11. Fidaleo M. Peroxisomes and peroxisomal disorders: The main facts. *Experimental*  
406 *and Toxicologic Pathology*. 2009;62(6):615-25.
- 407 12. Wanders RJA, Waterham HR. Biochemistry of mammalian peroxisomes revisited.  
408 *Annual Review of Biochemistry*. 2006;75:295-332.
- 409 13. Wanders RJA, Ferdinandusse S, Brites P, Kemp S. Peroxisomes, lipid metabolism and  
410 lipotoxicity. *Biochimica et Biophysica Acta (BBA) - Molecular and Cell Biology of Lipids*.  
411 2010;1801(3):272-80.
- 412 14. Gehrman W, Elsner M, Lenzen S. Role of metabolically generated reactive oxygen  
413 species for lipotoxicity in pancreatic  $\beta$ -cells. *Diabetes, Obesity and Metabolism*.  
414 2010;12:149-58.
- 415 15. Lenzen S, Drinkgern J, Tiedge M. Low antioxidant enzyme gene expression in  
416 pancreatic islets compared with various other mouse tissues. *Free Radical Biology and*  
417 *Medicine*. 1996;20(3):463-6.
- 418 16. Tiedge M, Lortz S, Drinkgern J, Lenzen S. Relation Between Antioxidant Enzyme Gene  
419 Expression and Antioxidative Defense Status of Insulin-Producing Cells. *Diabetes*.  
420 1997;46(11):1733-42.
- 421 17. Elsner M, Gehrman W, Lenzen S. Peroxisome-Generated Hydrogen Peroxide as  
422 Important Mediator of Lipotoxicity in Insulin-Producing Cells. *Diabetes*. 2011;60(1):200-8.
- 423 18. Huybrechts SJ, Van Veldhoven PP, Brees C, Mannaerts GP, Los GV, Franssen M.  
424 Peroxisome Dynamics in Cultured Mammalian Cells. *Traffic*. 2009;10(11):1722-33.



- 425 19. Tabak HF, Murk JL, Braakman I, Geuze HJ. Peroxisomes Start Their Life in the  
426 Endoplasmic Reticulum. *Traffic*. 2003;4(8):512-8.
- 427 20. Schrader M, Bonekamp NA, Islinger M. Fission and proliferation of peroxisomes.  
428 *Biochimica et Biophysica Acta (BBA) - Molecular Basis of Disease*. 2012;1822(9):1343-57.
- 429 21. Lazarow PB, Fujiki Y. Biogenesis of peroxisomes. *Annu Rev Cell Biol*. 1985;1:489-530.  
430 Epub 1985/01/01.
- 431 22. Schrader M, Reuber BE, Morrell JC, Jimenez-Sanchez G, Obie C, Stroh TA, et al.  
432 Expression of PEX11{beta} Mediates Peroxisome Proliferation in the Absence of Extracellular  
433 Stimuli. *Journal of Biological Chemistry*. 1998;273(45):29607-14.
- 434 23. Li X, Baumgart E, Morrell JC, Jimenez-Sanchez G, Valle D, Gould SJ. PEX11{beta}  
435 Deficiency Is Lethal and Impairs Neuronal Migration but Does Not Abrogate Peroxisome  
436 Function. *Mol Cell Biol*. 2002;22(12):4358-65.
- 437 24. Li X, Gould SJ. PEX11 Promotes Peroxisome Division Independently of Peroxisome  
438 Metabolism. *The Journal of Cell Biology*. 2002;156(4):643-51.
- 439 25. Nile DL, Brown AE, Kumaheri MA, Blair HR, Heggie A, Miwa S, et al. Age-related  
440 mitochondrial DNA depletion and the impact on pancreatic Beta cell function. *PLoS One*.  
441 2014;9(12):e115433. Epub 2014/12/23.
- 442 26. Ishihara H, Asano T, Tsukuda K, Katagiri H, Inukai K, Anai M, et al. Overexpression of  
443 hexokinase I but not GLUT1 glucose transporter alters concentration dependence of  
444 glucose-stimulated insulin secretion in pancreatic beta-cell line MIN6. *Journal of Biological  
445 Chemistry*. 1994;269(4):3081-7.
- 446 27. Mookerjee SA, Goncalves RLS, Gerencser AA, Nicholls DG, Brand MD. The  
447 contributions of respiration and glycolysis to extracellular acid production. *Biochimica et  
448 Biophysica Acta (BBA) - Bioenergetics*. 2015;1847(2):171-81.
- 449 28. Chwa M, Atilano SR, Reddy V, Jordan N, Kim DW, Kenney MC. Increased Stress-  
450 Induced Generation of Reactive Oxygen Species and Apoptosis in Human Keratoconus  
451 Fibroblasts. *Investigative Ophthalmology & Visual Science*. 2006;47:1902-10.
- 452 29. Gehrman W, Elsner M. A specific fluorescence probe for hydrogen peroxide  
453 detection in peroxisomes. *Free Radic Res*. 2011;45(5):501-6.
- 454 30. Kelpel CL, Moore PC, Parazzoli SD, Wicksteed B, Rhodes CJ, Poitout V. Palmitate  
455 Inhibition of Insulin Gene Expression Is Mediated at the Transcriptional Level via Ceramide  
456 Synthesis. *Journal of Biological Chemistry*. 2003;278(32):30015-21.
- 457 31. Hellemans K, Kerckhofs K, Hannaert J-C, Martens G, Van Veldhoven P, Pipeleers D.  
458 Peroxisome proliferator-activated receptor  $\alpha$ -retinoid X receptor agonists induce beta-cell  
459 protection against palmitate toxicity. *FEBS Journal*. 2007;274(23):6094-105.
- 460 32. Krizhanovskii C, Fred RG, Oskarsson ME, Westermarck GT, Welsh N. Addition of  
461 exogenous sodium palmitate increases the IAPP/insulin mRNA ratio via GPR40 in human  
462 EndoC-betaH1 cells. *Upsala journal of medical sciences*. 2017;122(3):149-59. Epub  
463 2017/10/06.
- 464 33. Li Z, Zhou M, Cai Z, Liu H, Zhong W, Hao Q, et al. RNA-binding protein DDX1 is  
465 responsible for fatty acid-mediated repression of insulin translation. *Nucleic acids research*.  
466 2018;46(22):12052-66. Epub 2018/10/09.
- 467 34. Rebelato E, Abdulkader F, Curi R, Carpinelli AR. Low doses of hydrogen peroxide  
468 impair glucose-stimulated insulin secretion via inhibition of glucose metabolism and  
469 intracellular calcium oscillations. *Metabolism: clinical and experimental*. 2010;59(3):409-13.  
470 Epub 2009/10/06.



471 35. Baboota RK, Shinde AB, Lemaire K, Fransen M, Vinckier S, Van Veldhoven PP, et al.  
472 Functional peroxisomes are required for beta-cell integrity in mice. *Molecular metabolism*.  
473 2019;22:71-83. Epub 2019/02/24.

474

475 **Supplementary Information:**

476 **S Fig 1. The effect of palmitate incubation on insulin secretion and cytotoxicity in MIN6**  
477 **cells.** MIN6 cells were incubated with either 250 $\mu$ M palmitate or BSA control for 48hrs. **A)**  
478 Cells were challenged with either 3mM or 25mM glucose and insulin secretion was  
479 measured. Data are from 3 separate experiments carried out in triplicate are presented as  
480 mean $\pm$ SEM. **B)** LDH release into the medium and compared with the LDH assay positive  
481 control. Data are from 3 separate experiments carried out in triplicate are presented as  
482 mean $\pm$ SEM. **C)** Caspase 3/7 activity was measured using the luminescent Caspase-Glo<sup>®</sup> 3/7  
483 assay. Staurosporine was used as a positive control. Data are from 6 separate experiments  
484 carried out in triplicate are presented as mean $\pm$ SEM. \*P<0.05, \*\*\*P<0.001 vs BSA control.  
485

**Figure 1**

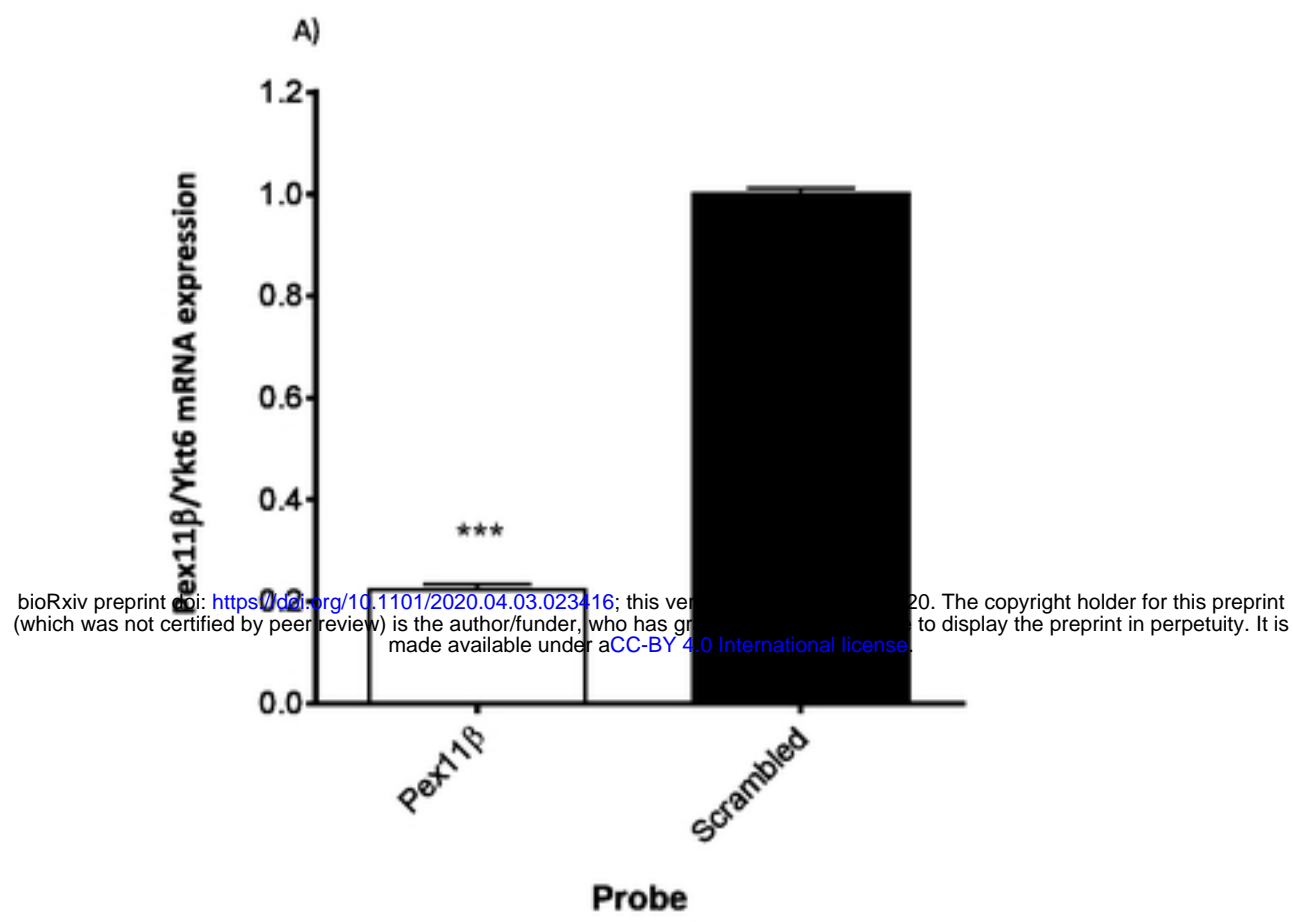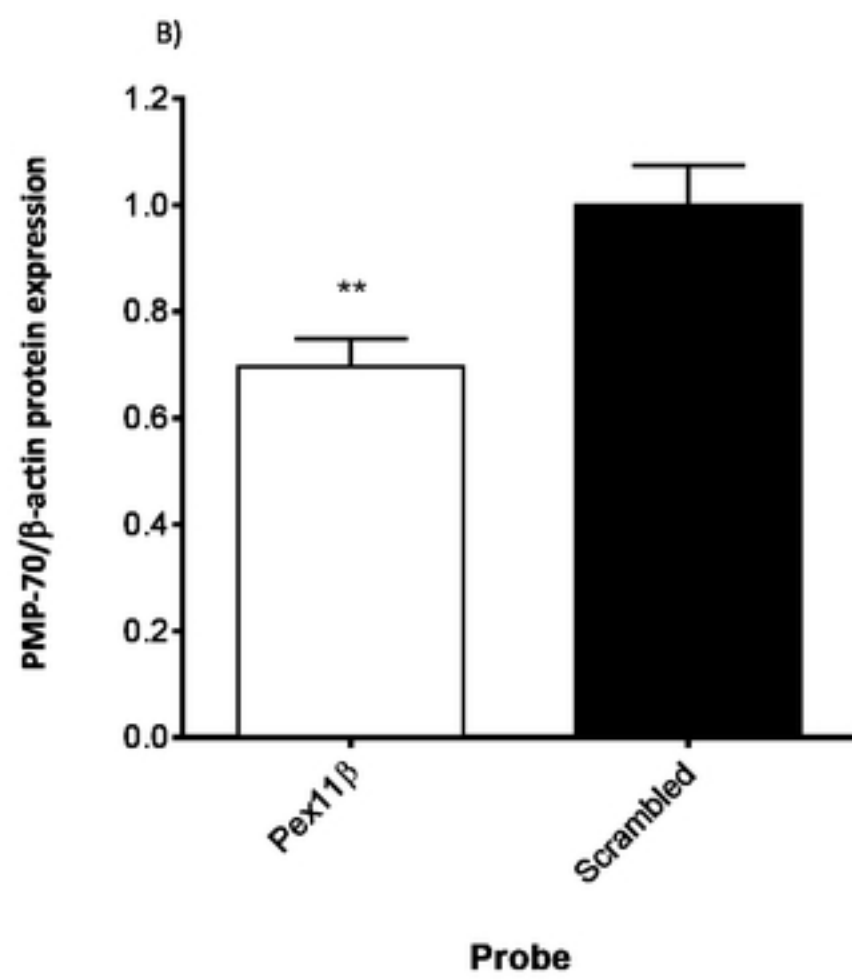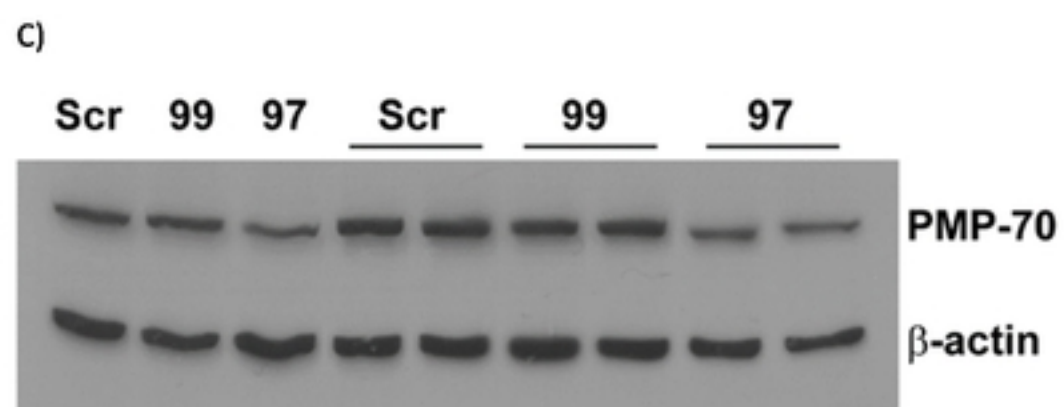

Figure 2

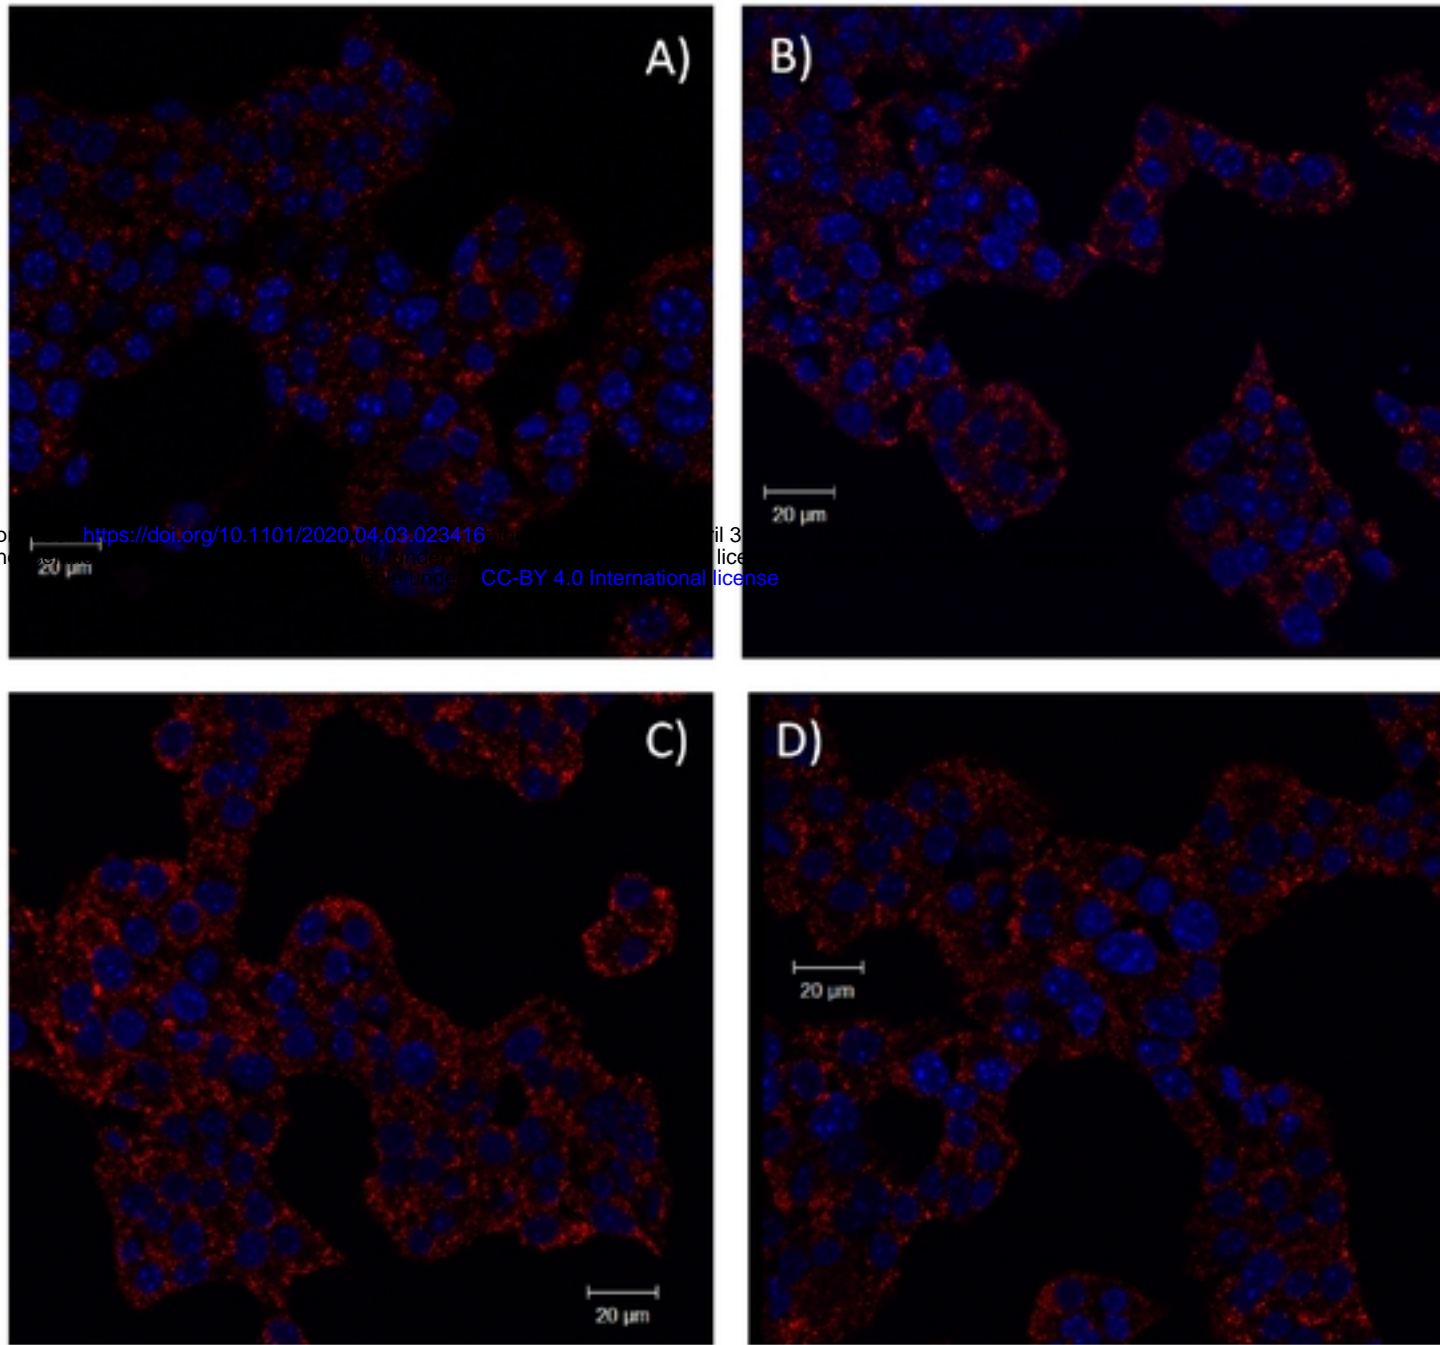

bioRxiv preprint  
(which was not certified by peer review)

<https://doi.org/10.1101/2020.04.03.023416>

CC-BY 4.0 International license

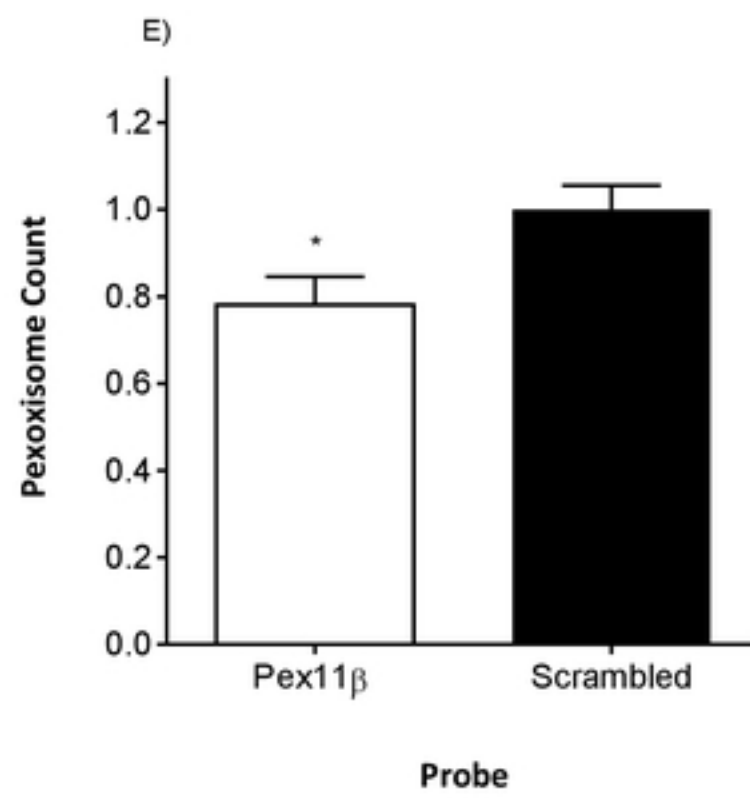

Figure 3

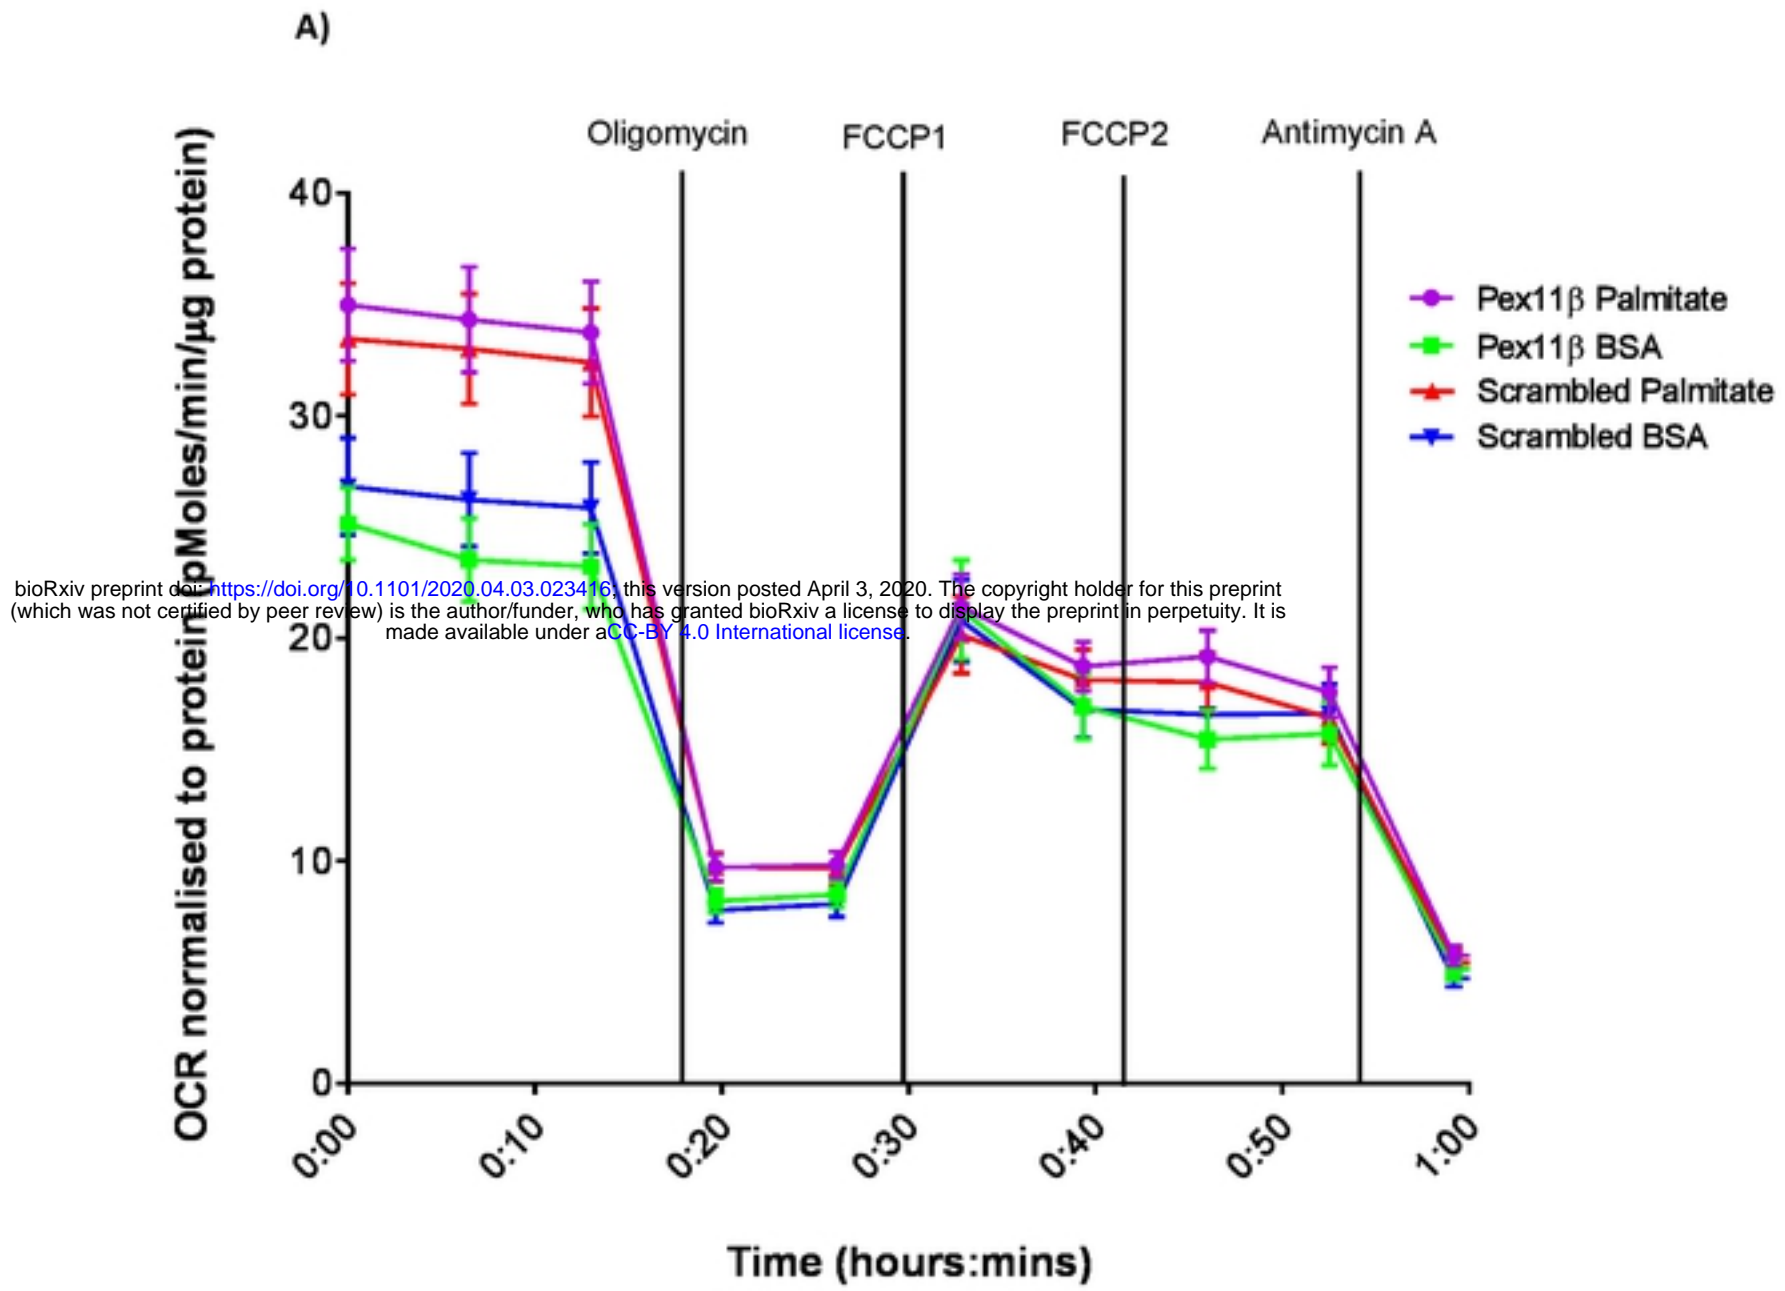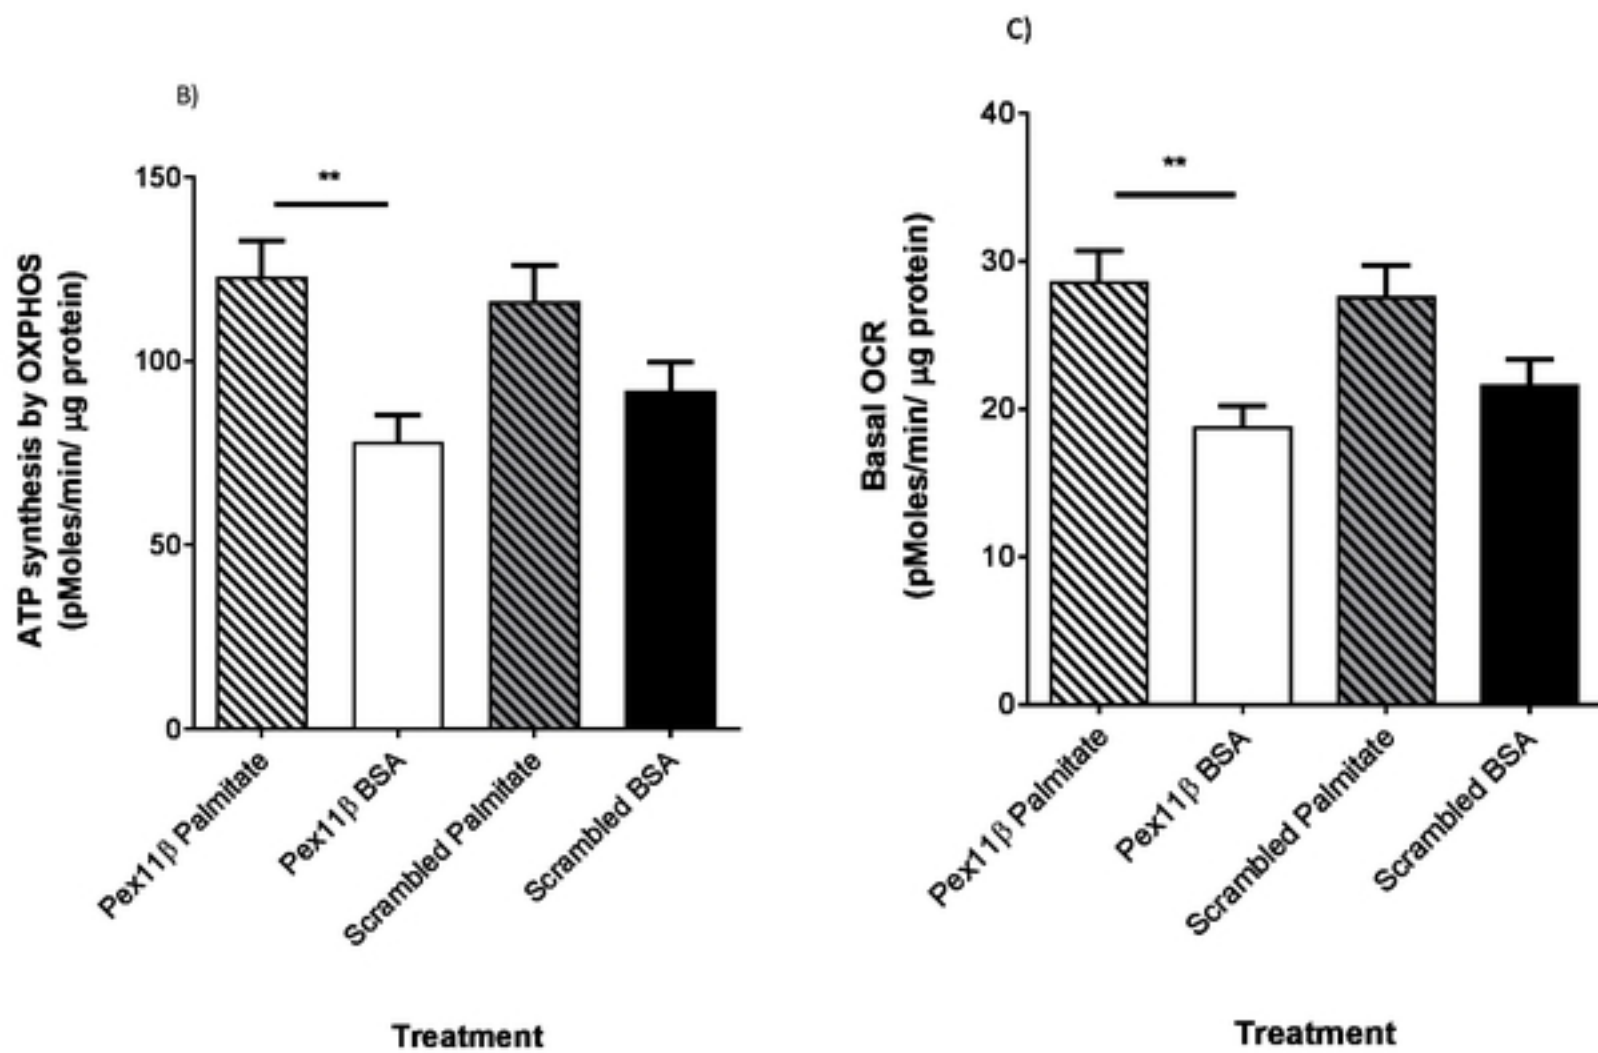

**Figure 4**

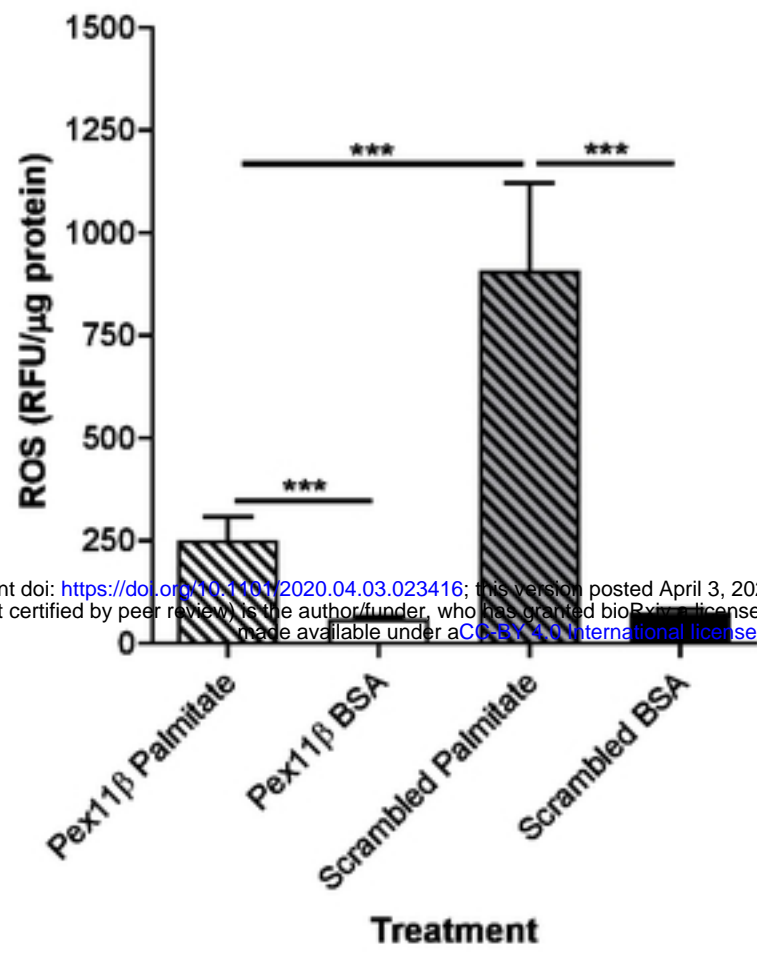

Figure 5

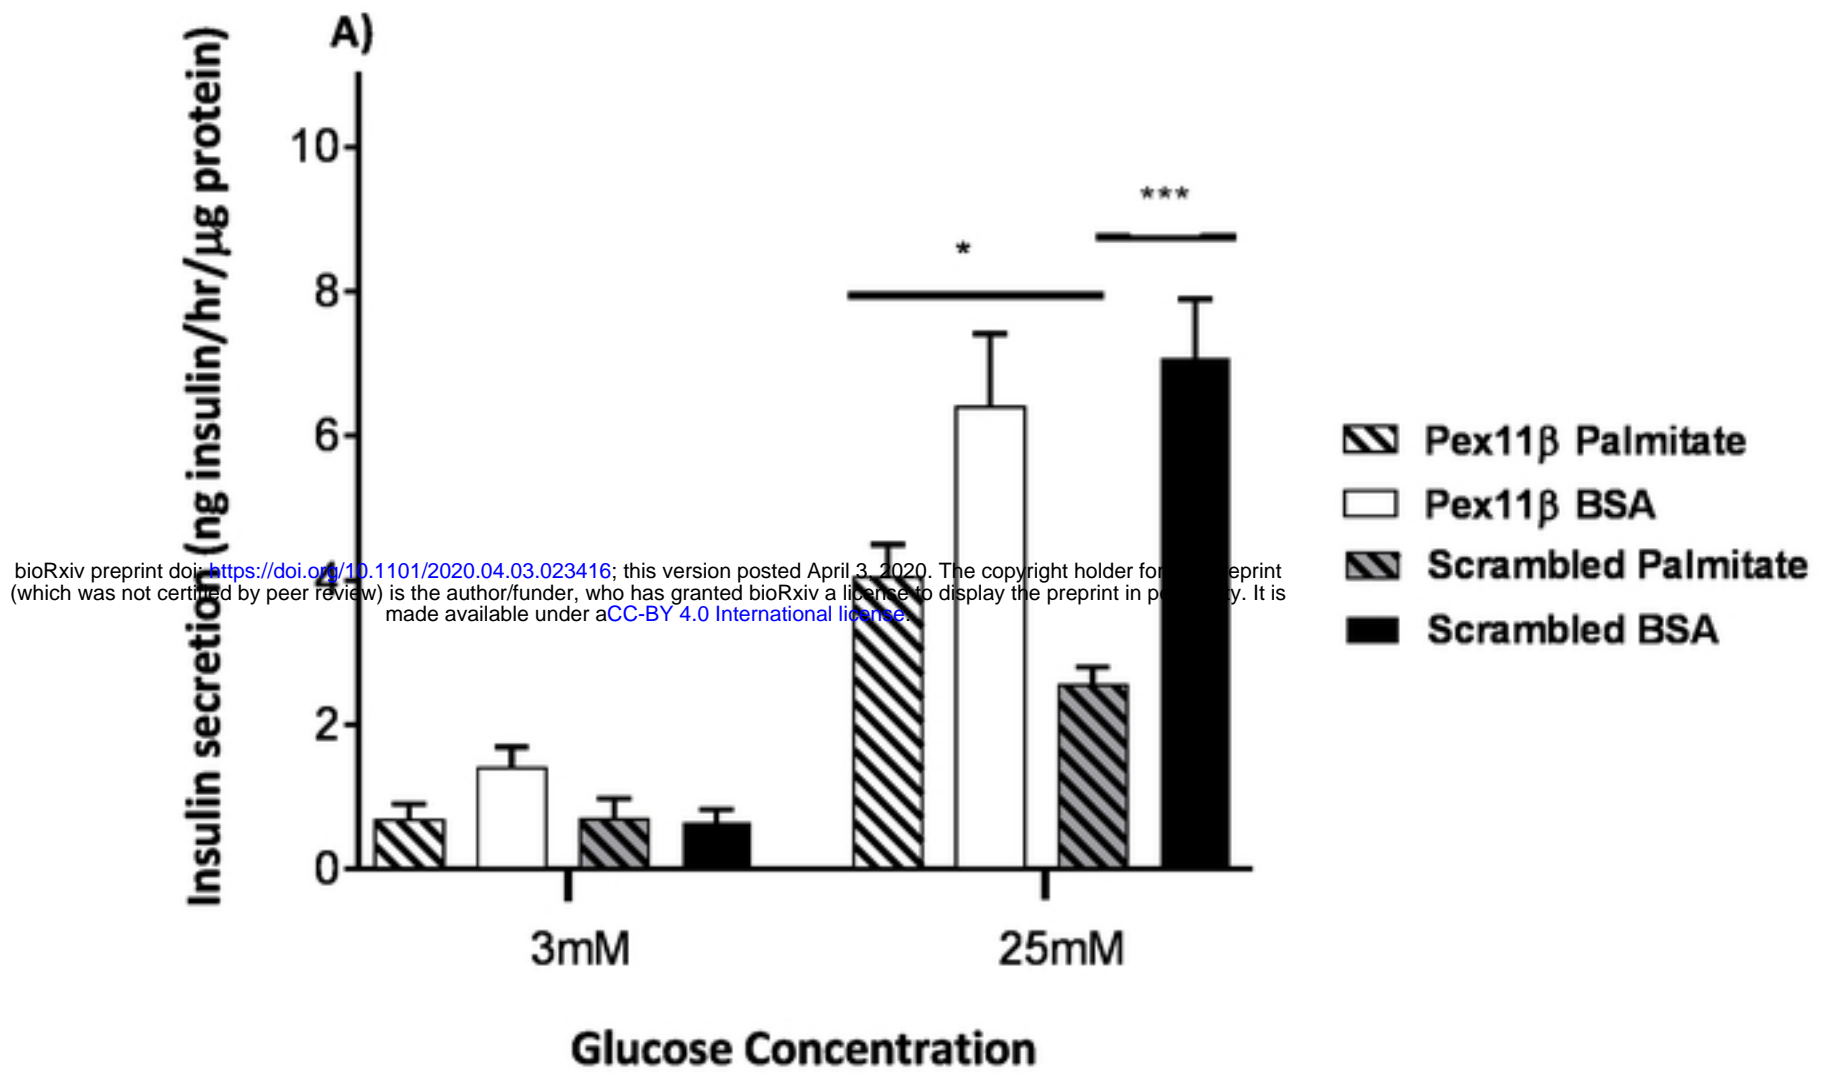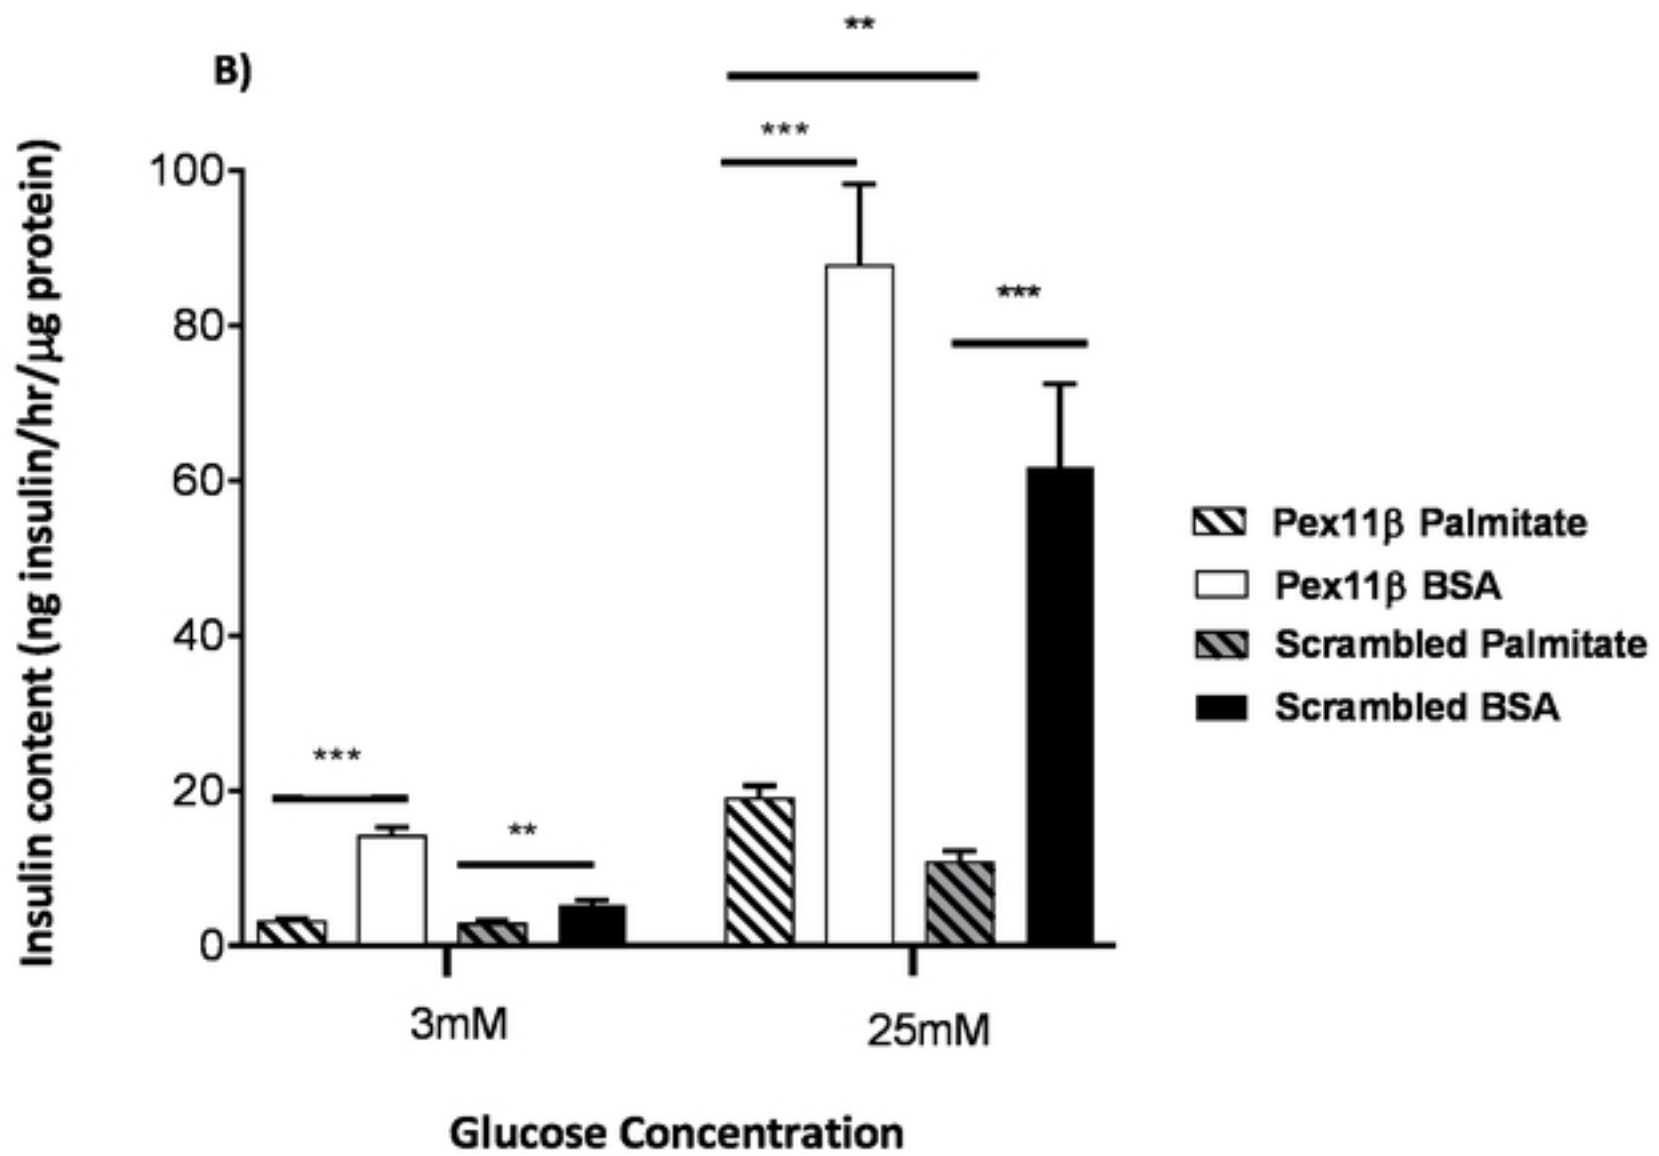

Source: https://biorxiv.org/content/10.1101/2020.04.03.023416v1.full.pdf
